# Supplementary material
Source: PubMed Central journal article supplement (PMC8727586)
Supplement: 41416_2021_1592_MOESM6_ESM.pdf [file 41416_2021_1592_MOESM6_ESM.pdf]

**Figure S1**

MAVERICC trial

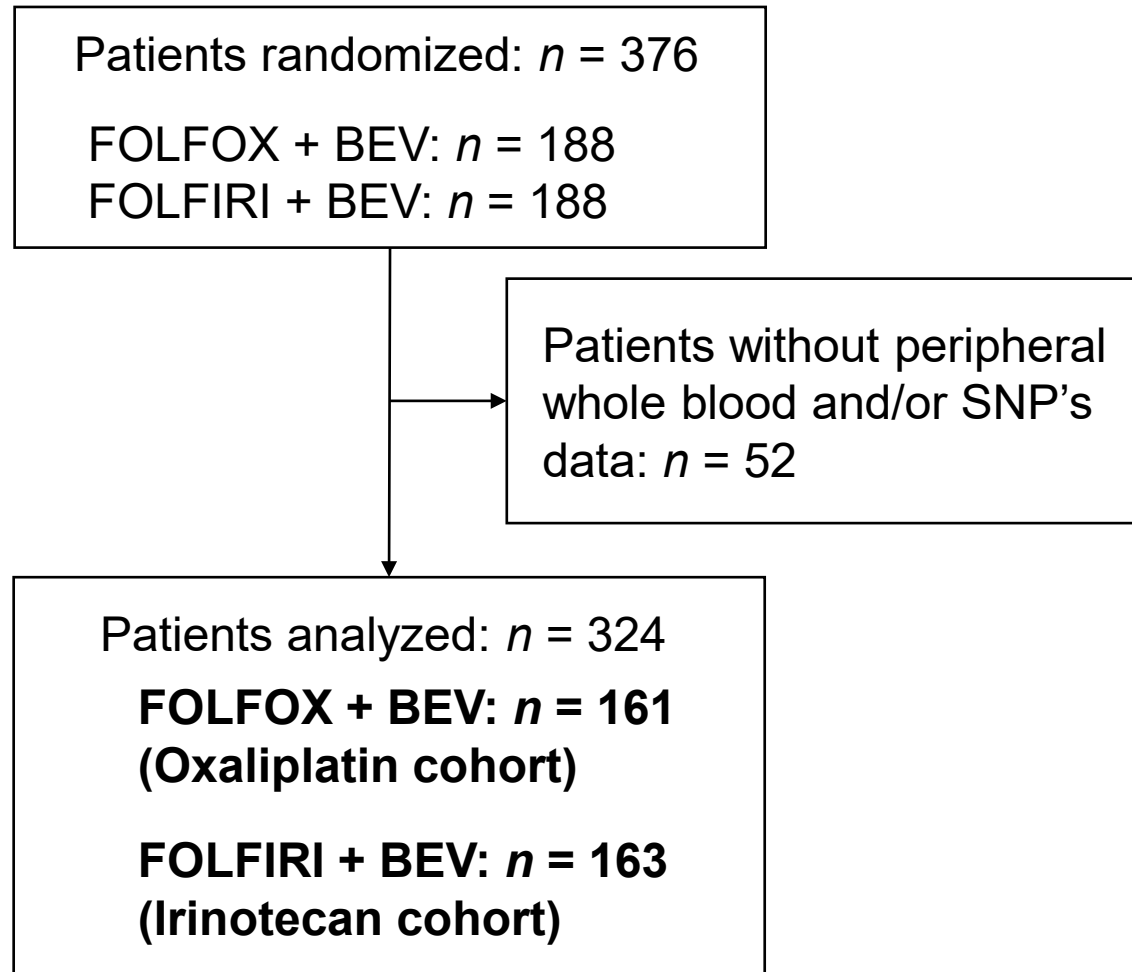

CONSORT diagram.

Abbreviations: BEV, bevacizumab; SNP, single nucleotide polymorphism.
