# Supplementary material
Source: PubMed Central journal article supplement (PMC8727586)
Supplement: 41416_2021_1592_MOESM7_ESM.pdf [file 41416_2021_1592_MOESM7_ESM.pdf]

**Figure S2**

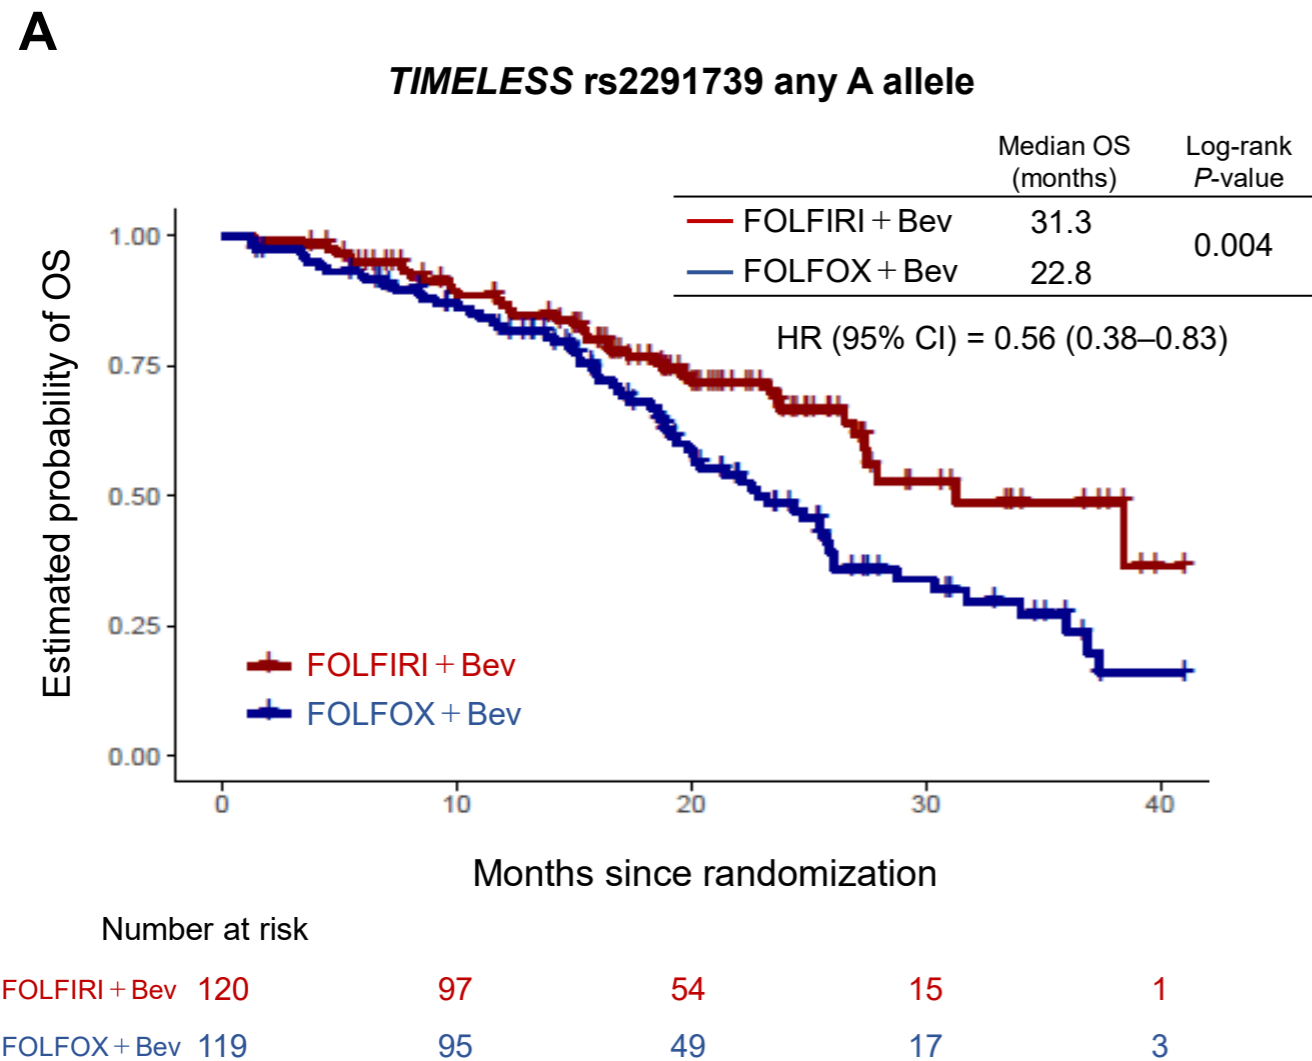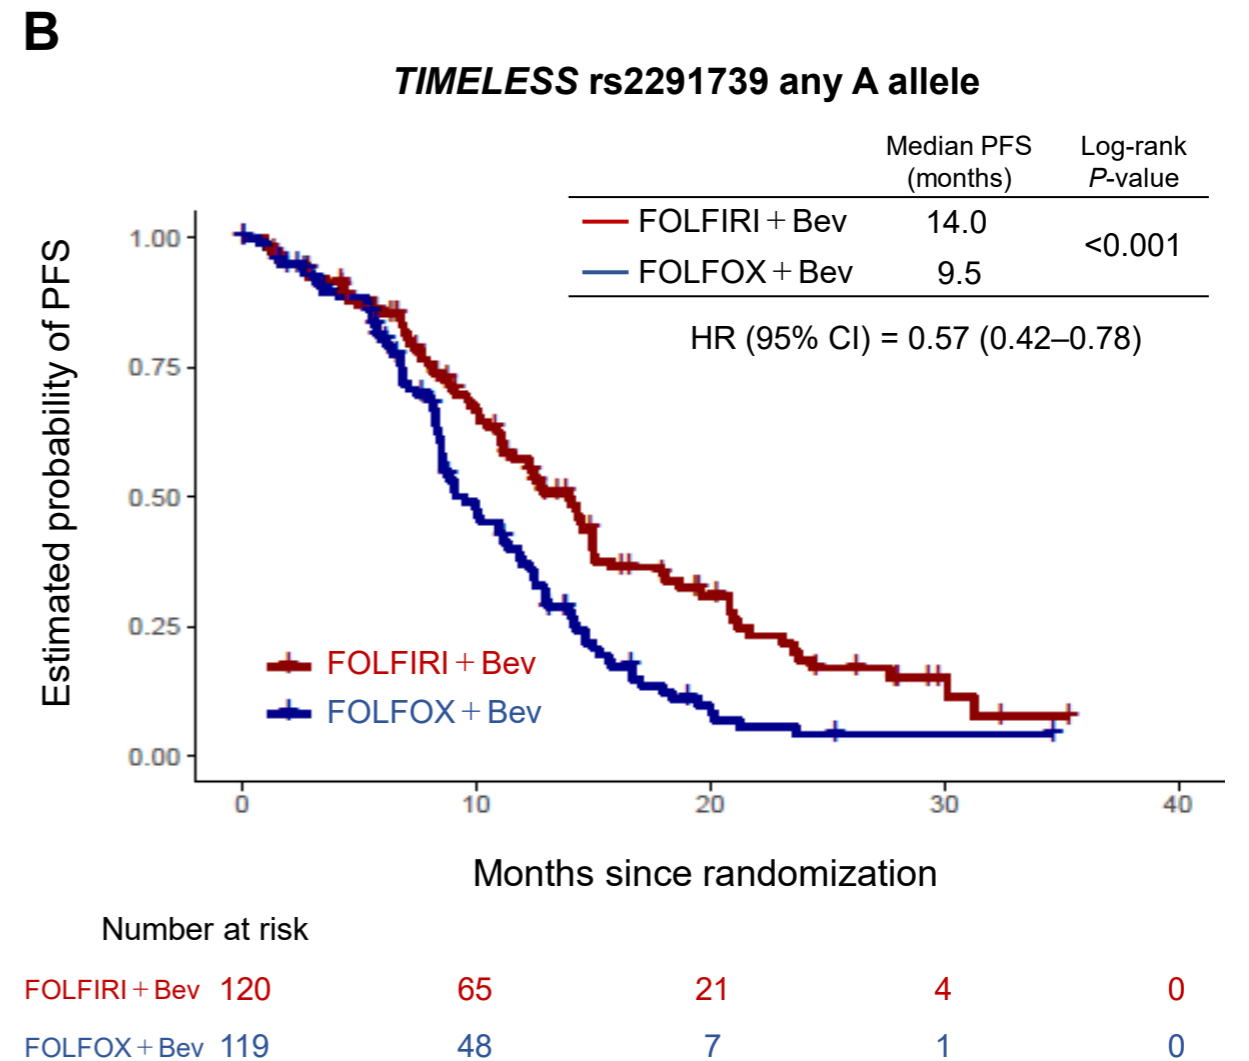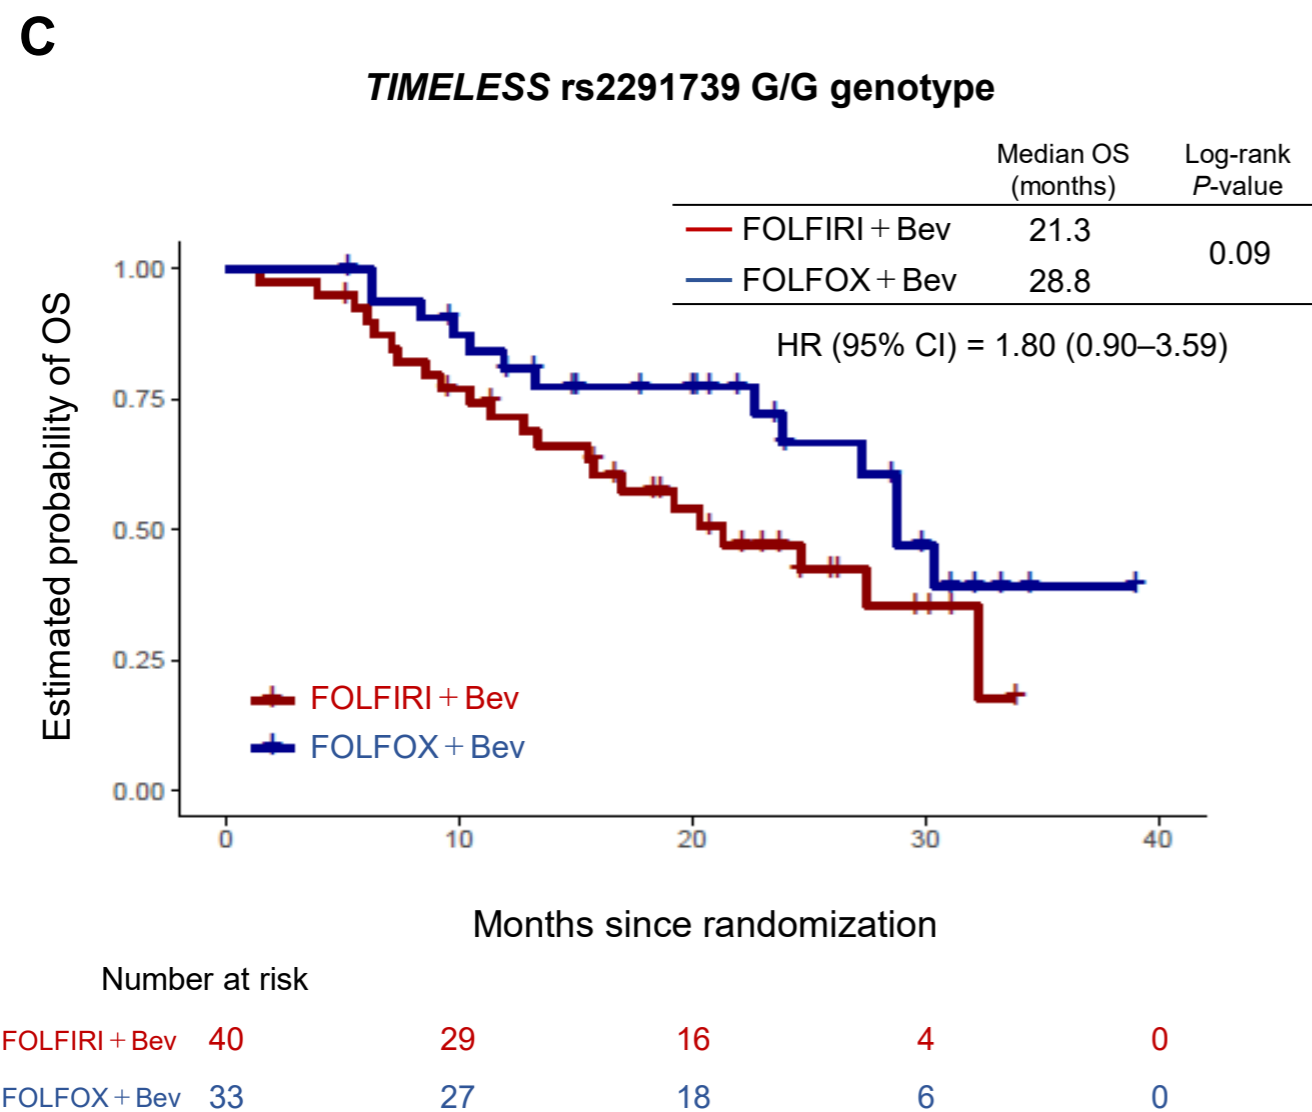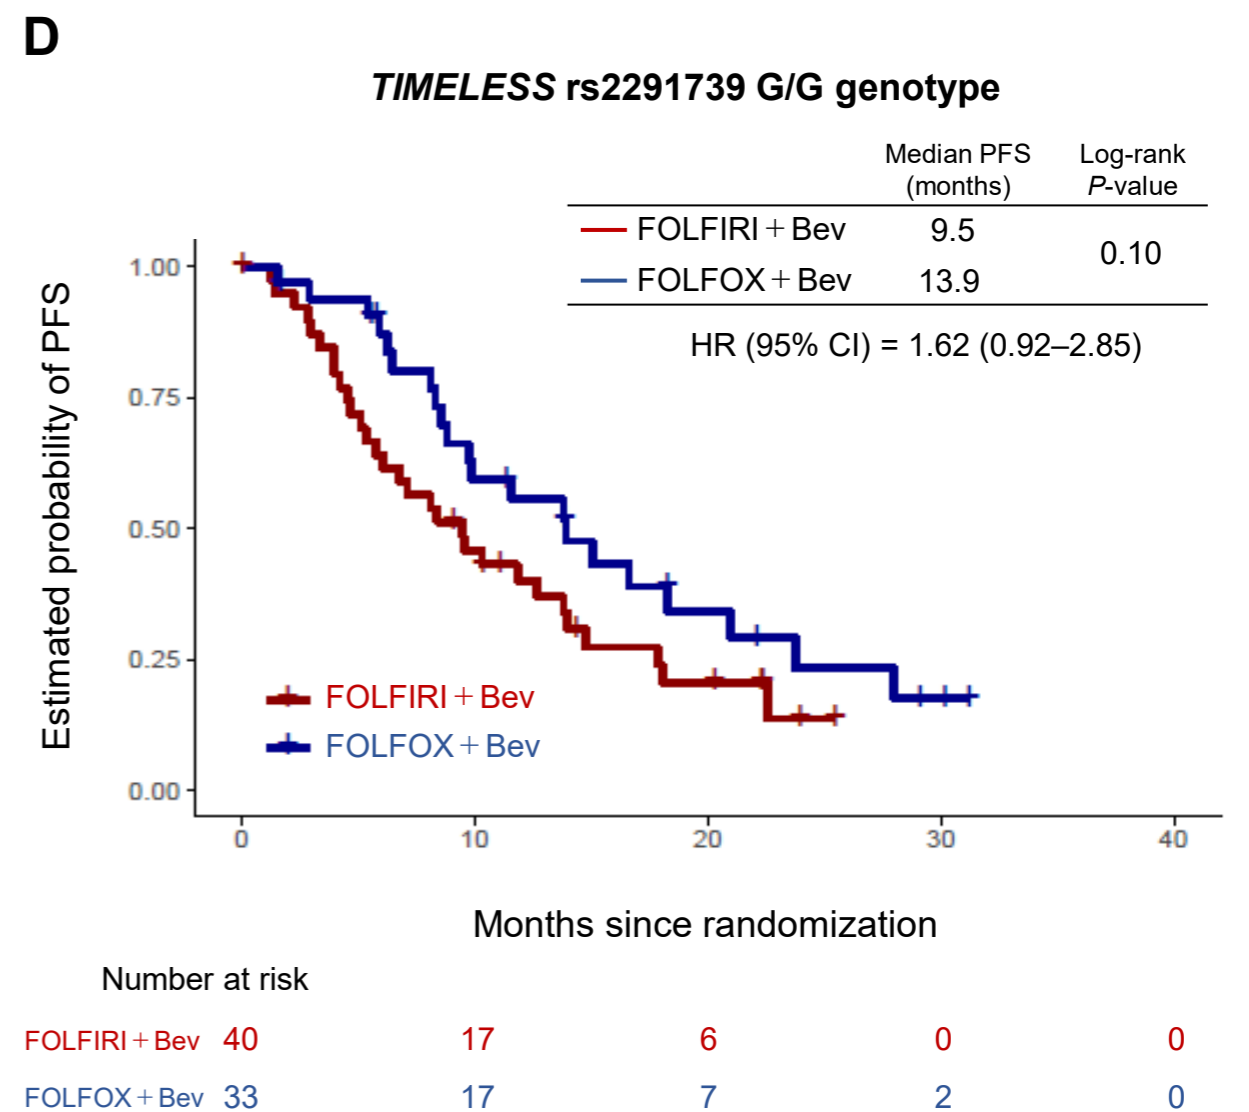

The Kaplan-Meier curves compare survival outcomes between patients treated with FOLFOX/Bev and those treated with FOLFIRI/Bev in subgroups based on *TIMELESS* rs2291739 genotype.

Abbreviations: Bev, bevacizumab; CI, confidence interval; HR, hazard ratio; OS, overall survival; PFS, progression-free survival.
